# Supplementary figures and images for: Clinical management of older people with non-small cell lung cancer in England
Source: HighWire-hosted journal article supplement (doi:10.1136/thoraxjnl-2011-200994), 2012-07-06

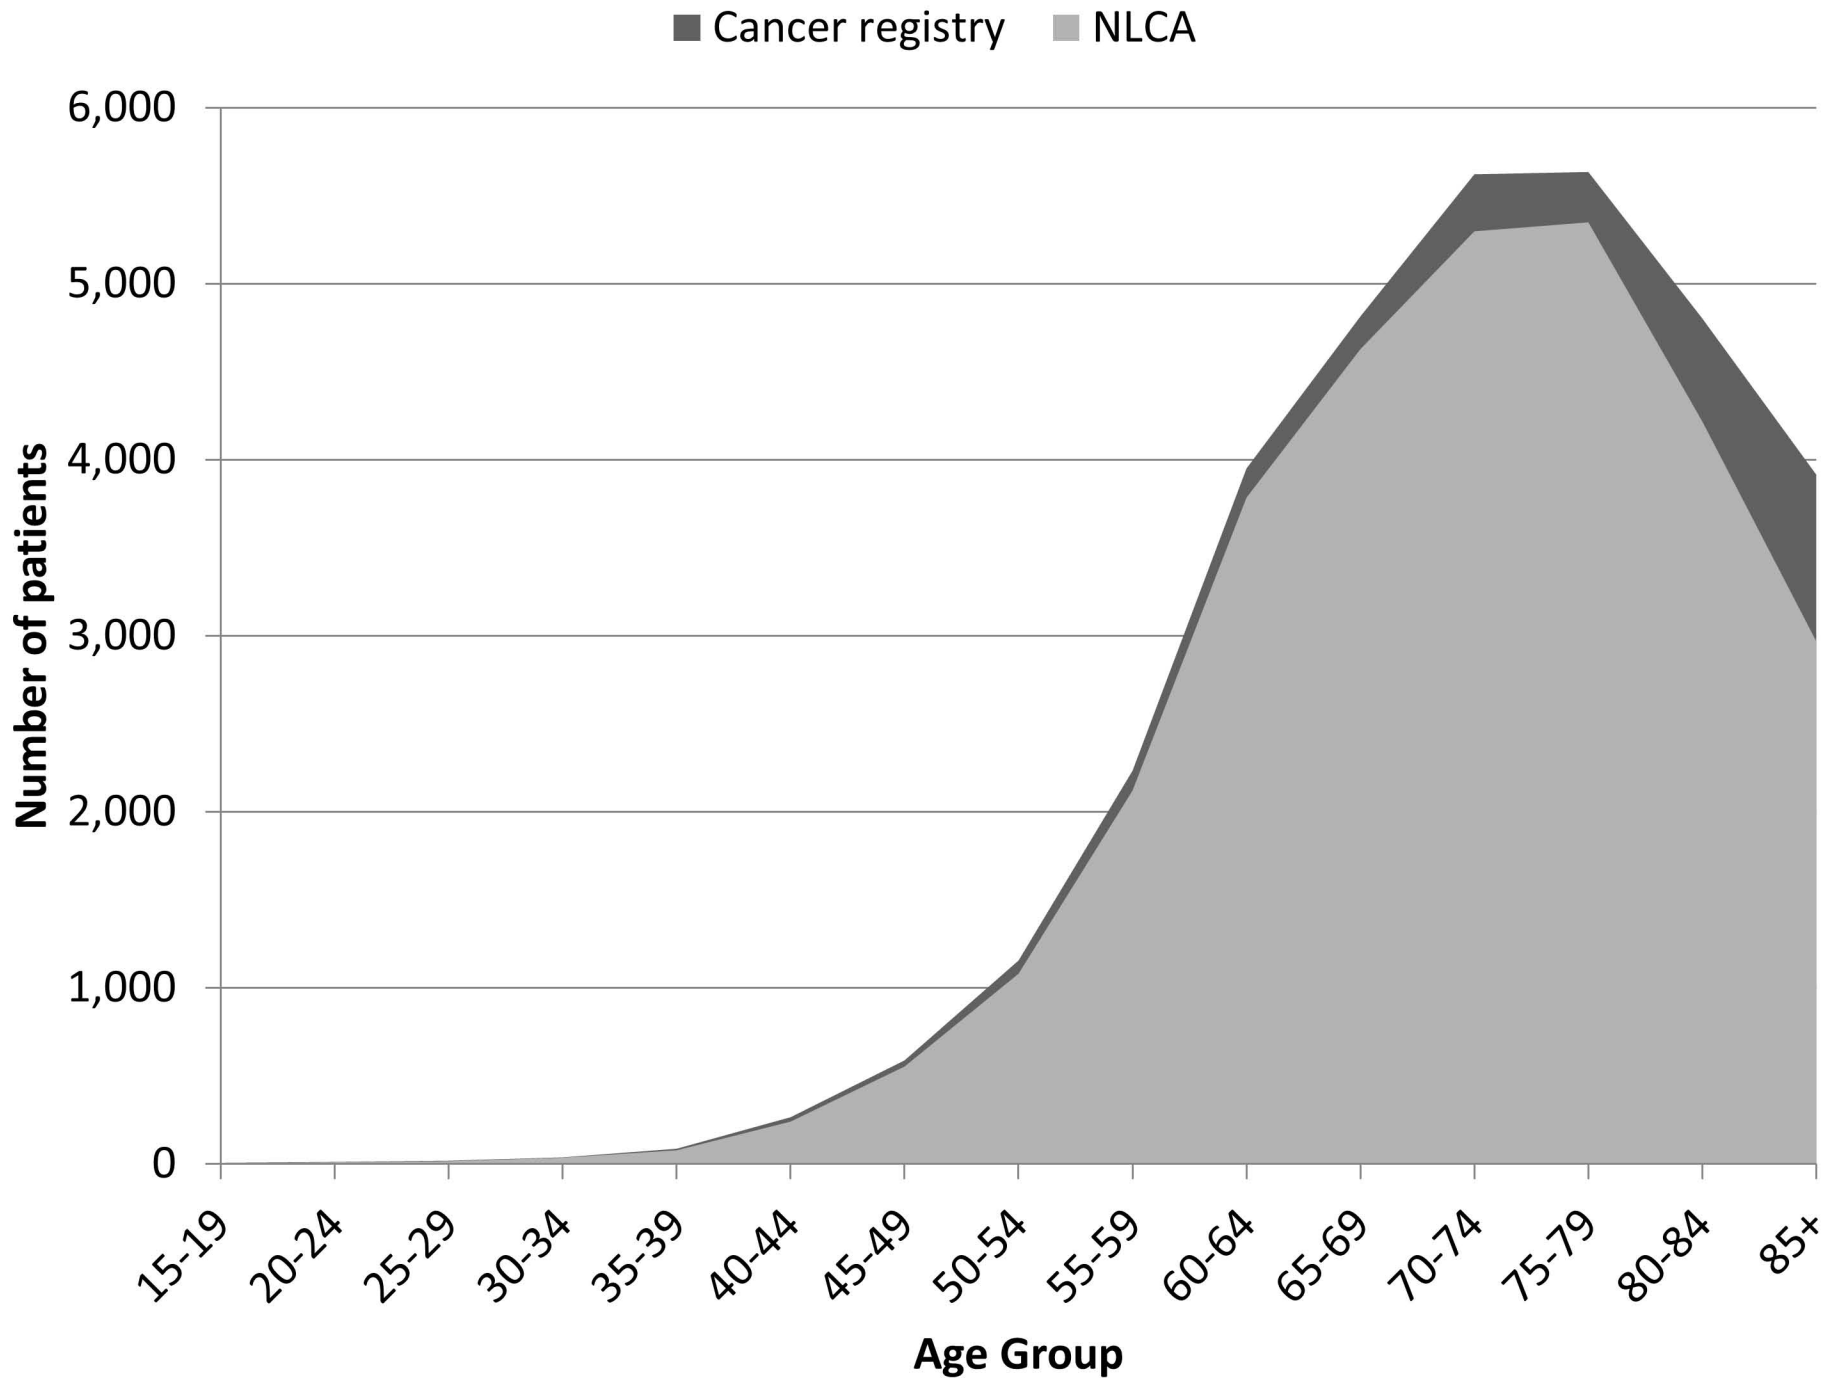

Supplement: thoraxjnl-2011-200994-s1.pdf [file thoraxjnl-2011-200994-s1.pdf]
